# Supplementary material
Source: HighWire-hosted journal article supplement (https://oem.bmj.com/content/75/2/114)
Supplement: inline-supplementary-material-1 [file inline-supplementary-material-1.pdf]

Table s-1. Psychosocial working conditions during working life were assessed retrospectively by items from different scales derived and modified from the Copenhagen Psychosocial Questionnaire. Participants were to reply to the followings items when looking back on their entire working life.

| Scales                        | Items                                                                            | Response categories                                     |
|-------------------------------|----------------------------------------------------------------------------------|---------------------------------------------------------|
| Quantitative demands          | How often did you not have time to complete all your work tasks?                 |                                                         |
| Influence                     | Did you have a large degree of influence concerning your work?                   |                                                         |
| Emotional demands             | Did you have to relate to other people's personal problems as part of your work? | always; often; sometimes;<br>seldom; never/hardly never |
| Work pace                     | Did you have to work very fast?                                                  |                                                         |
| Role conflicts                | Were contradictory demands placed on you at work?                                | to a very large extent; to a<br>large extent; somewhat; |
| Possibilities for development | Did you know exactly which areas were your responsibilities?                     | to a small extent; to a very<br>small extent            |
| Recognition/Appreciation      | Was your work recognized and appreciated by the management?                      |                                                         |
